# Supplementary material for: An ultra-high-entropy rare earth orthoferrite (UHE REO): solution combustion synthesis, structural features and ferrimagnetic behavior
Source: Royal Society of Chemistry journal article supplement (doi:10.1039/d2dt04103k), 2023-01-01
Supplement: d2dt04103k1.pdf [file d2dt04103k1.pdf]

**SUPPLEMENTARY INFORMATION**

**Ultra-high-entropy rare earth orthoferrite (UHE REO): solution combustion synthesis, structural features and ferrimagnetic behavior**

Long M. Bui\*, Son T. Cam, Ivan V. Buryanenko, Valentin G. Semenov, Denis V. Nazarov, Pavel E. Kazin, Vladimir N. Nevedomskiy, Evgeny Y. Gerasimov,  
and Vadim I. Popkov

**Table S1.** The magnetic properties of orthorhombic rare earth orthoferrites

| No | Orthorhombic<br>RE<br>orthoferrite                   | Synthesis method                        | Crystallite<br>size, nm | Crystallite<br>morphology | $M_s$ | $M_r$ | $H_c$ | Reference                             |
|----|------------------------------------------------------|-----------------------------------------|-------------------------|---------------------------|-------|-------|-------|---------------------------------------|
|    |                                                      |                                         |                         |                           | emu/g | emu/g | Oe    |                                       |
| 1  | LaFeO <sub>3</sub>                                   | Citrate-nitrate auto-combustion         | 23.5                    | Spherical                 | 0.3   | 0.049 | 257   | [DOI: 10.1007/s10904-021-01887-5]     |
| 2  | HoFeO <sub>3</sub>                                   | Optical-floating-zone                   | 48                      | Foam                      | 0.043 | 0.038 | 84    | [DOI: 10.1016/j.jcrysgro.2010.11.014] |
| 3  | ErFeO <sub>3</sub>                                   | Pulsed laser deposition (PLD) technique | –                       | –                         | 0.58  | 0.40  | 2200  | [DOI: 10.1063/1.4829468]              |
| 4  | GdFeO <sub>3</sub>                                   | Chemical co-precipitation               | 35                      | Isometric                 | 0.14  | 0.025 | –     | [DOI: 10.1080/07315171.2014.956020]   |
| 5  | YFeO <sub>3</sub>                                    | Glycine-nitrate combustion              | 41                      | Plate-like                | 1.09  | 0.39  | 22000 | [DOI: 10.1007/s10854-017-6676-1]      |
| 6  | Ce <sub>0.7</sub> La <sub>0.3</sub> FeO <sub>3</sub> | Citrate-nitrate auto-combustion         | 21.3                    | Spherical                 | 1.35  | 0.168 | 192   | [DOI: 10.1007/s10904-021-01887-5]     |
| 7  | Pr <sub>0.7</sub> La <sub>0.3</sub> FeO <sub>3</sub> | Citrate-nitrate auto-combustion         | 16.8                    | Spherical                 | 0.353 | 0.024 | 220   | [DOI: 10.1007/s10904-021-01887-5]     |
| 8  | Nd <sub>0.7</sub> La <sub>0.3</sub> FeO <sub>3</sub> | Citrate-nitrate auto-combustion         | 14.8                    | Spherical                 | 0.284 | 0.011 | 387   | [DOI: 10.1007/s10904-021-01887-5]     |
| 9  | Sm <sub>0.7</sub> La <sub>0.3</sub> FeO <sub>3</sub> | Citrate-nitrate auto-combustion         | 15.0                    | Spherical                 | 0.447 | 0.191 | 4848  | [DOI: 10.1007/s10904-021-01887-5]     |
| 10 | Gd <sub>0.7</sub> La <sub>0.3</sub> FeO <sub>3</sub> | Citrate-nitrate auto-combustion         | 22.4                    | Spherical                 | 1.771 | 0.027 | 158   | [DOI: 10.1007/s10904-021-01887-5]     |
| 11 | $\Sigma REFeO_3$                                     | Glycine-nitrate combustion              | 50                      | Foam-like                 | 1.5   | 0.53  | 225   | This work                             |

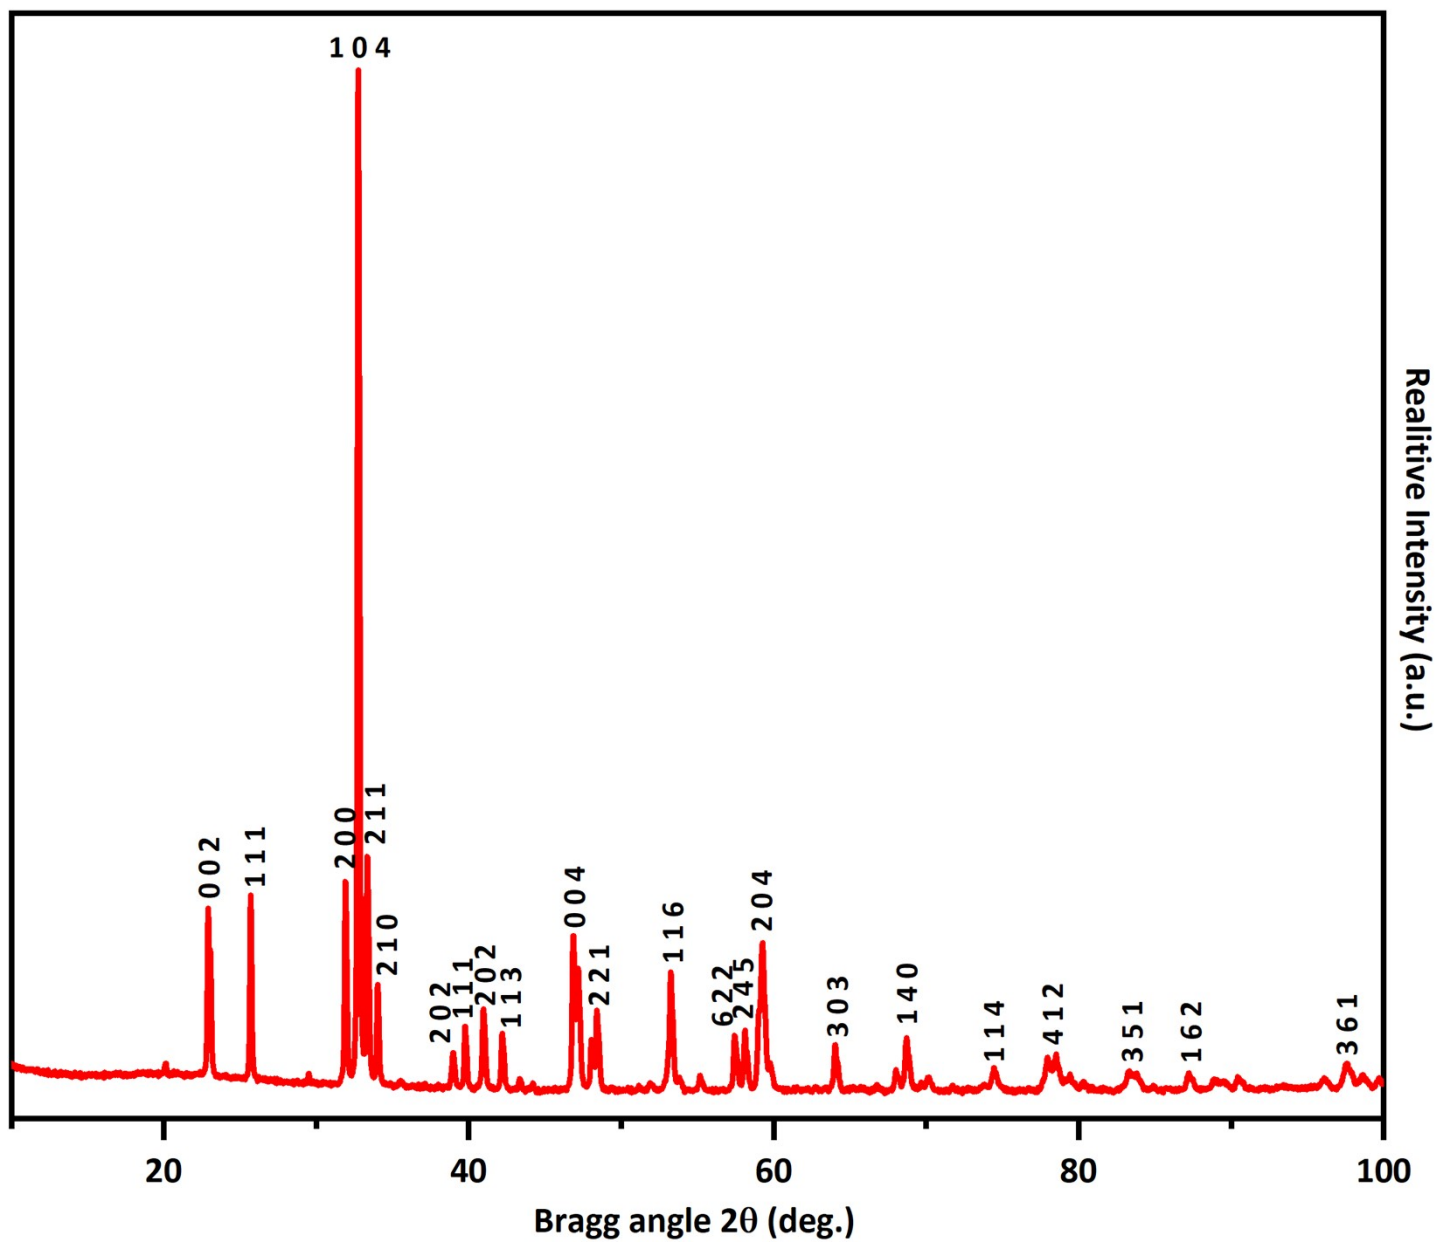

Fig. S1. Expanded PXRD pattern of the UHE REO sample.
